# Supplementary material for: A High-Density Genetic Map Enables Genome Synteny and QTL Mapping of Vegetative Growth and Leaf Traits in Gardenia
Source: Front Genet. 2022 Jan 4;12:802738. doi: 10.3389/fgene.2021.802738 (PMC8817757; doi:10.3389/fgene.2021.802738)
Supplement: Supplementary file 1 [file Table2.XLSX]

## Sheet: Data Summary for phenotype
Supplementary Table S2. Data Summary for phenotype.
Trait	Year	Mean±SD	Maximum	Minimum	Skewness	Kurtosis	Coefficient of variance (%)	Variance	Shapiro-wilk P-value
CD	2019	26.426±12.595	81.2	6.467	1.517	2.923	47.663	158.636	0
	2020	34.771±17.267	123.5	8	1.69	4.807	49.659	298.149	0
	2021	57.896±29.904	182.5	13.833	1.066	1.422	51.651	894.241	0
BSBN	2019	9.665±6.265	24	1	0.457	-1.106	64.826	39.256	0
	2020	2.77±1.829	12	1	1.487	3.525	66.052	3.347	0
	2021	2.787±2.116	12	1	1.905	4.73	75.927	4.479	0
SI	2019	76.788±11.734	95	30	-1.021	1.493	15.281	137.689	0
	2020	76.735±11.731	95	30	-1.003	1.494	15.287	137.61	0
	2021	77.144±11.222	95	30	-0.954	1.536	14.547	125.942	0
PH	2019	56.583±19.405	105.767	13.723	-0.071	-0.58	34.295	376.562	0.216
	2020	63.779±21.52	125.667	10.007	0.041	-0.037	33.741	463.102	0.616
	2021	92.234±29.446	165	27	0.063	-0.491	31.925	867.079	0.494
MSH	2019	52.897±19.427	101.533	11.333	0.037	-0.601	36.727	377.42	0.204
	2020	62.025±21.546	116.333	9.763	0.019	-0.318	34.738	464.236	0.632
	2021	91.896±30.632	172.6	16.933	0.136	-0.514	33.333	938.313	0.673
SBD	2019	5.354±1.449	10.963	2.24	0.806	1.351	27.065	2.1	0
	2020	5.57±1.751	12.29	1.827	0.687	1.071	31.432	3.066	0.002
	2021	8.861±2.875	19.233	3.74	1.116	1.568	32.448	8.266	0
LNS	2019	9.973±3.086	20	3	0.315	0.008	30.942	9.523	0.004
	2020	12.649±6.109	38	2	1.059	1.44	48.297	37.32	0
	2021	8.755±4.826	36	1	1.845	6.251	55.117	23.287	0
LNP	2019	49.904±28.767	152	6	0.921	0.584	57.644	827.542	0
	2020	51.92±32.693	157	5	0.808	0.336	62.968	1068.83	0
	2021	61.293±45.588	260	3	1.681	3.458	74.378	2078.29	0
LLLS	2019	97.172±26.48	170.257	18.884	-0.195	0.184	27.25	701.165	0.421
	2020	101.613±24.124	167.313	30.72	-0.074	-0.272	23.741	581.954	0.655
	2021	91.978±25.99	164.28	18.86	-0.102	0.247	28.257	675.485	0.972
LLWS	2019	31.797±7.205	50.973	10.283	-0.337	0.675	22.66	51.917	0.032
	2020	35.612±8.345	56.137	8.784	-0.053	0.15	23.432	69.634	0.315
	2021	29.737±8.78	50.313	3.667	-0.482	0.488	29.524	77.081	0.157
SLLS	2019	44.917±19.3	98.02	5.233	0.39	-0.291	42.967	372.48	0.007
	2020	40.12±20.791	100.673	4.843	0.398	-0.271	51.821	432.258	0.005
	2021	14.766±15.322	100.523	2.313	2.516	8.332	103.765	234.764	0
SLWS	2019	15.781±5.811	36.133	1.69	0.073	0.324	36.82	33.763	0.764
	2020	14.658±6.912	39.533	2.453	0.602	0.273	47.152	47.77	0.016
	2021	6.88±5.604	32.263	1.427	1.858	3.507	81.46	31.407	0
