# Supplementary material for: A High-Density Genetic Map Enables Genome Synteny and QTL Mapping of Vegetative Growth and Leaf Traits in Gardenia
Source: Front Genet. 2022 Jan 4;12:802738. doi: 10.3389/fgene.2021.802738 (PMC8817757; doi:10.3389/fgene.2021.802738)
Supplement: Supplementary file 9 [file Table8.XLS]

## Sheet: 原始结果
Supplementary Table S8. KASP genotyping results.
Sample ID	KASP ID
	21171	21173	21172	21174	21175	21176	21177	21178	21179	21180	21181	21182	21183	21184	21185	21186	21187
1	-	-	C/A	G/G	G/A	G/G	T/C	A/A	T/A	G/C	G/G	C/C	T/T	C/T	G/T	A/G	C/C
2	-	-	A/A	G/G	A/A	G/G	T/T	A/T	T/T	G/C	G/C	T/C	T/C	C/C	G/G	A/A	T/C
3	-	-	A/A	G/G	A/A	G/G	T/T	A/T	T/T	G/C	G/C	T/C	T/C	C/T	T/T	A/G	T/C
4	-	-	A/A	G/G	A/A	G/G	T/T	T/T	T/T	C/C	C/C	T/C	T/C	C/T	G/G	A/G	T/C
5	-	-	C/A	G/G	A/A	G/G	T/T	T/T	T/T	C/C	C/C	T/C	T/C	C/T	G/G	A/G	T/C
6	-	-	C/A	G/G	G/A	G/G	T/C	A/A	T/A	G/C	G/C	T/C	T/C	C/T	G/G	A/G	T/C
7	-	-	C/C	G/G	G/A	G/G	T/C	T/T	T/T	C/C	C/C	T/C	T/C	C/T	G/G	A/G	T/C
8	-	-	A/A	G/G	G/A	G/G	T/C	A/A	T/A	G/G	G/G	T/C	T/C	C/T	G/T	A/G	T/C
9	-	-	A/A	G/G	G/A	G/G	T/C	A/A	T/A	G/C	G/C	T/C	T/C	C/T	G/G	A/A	T/C
10	-	-	C/A	G/G	A/A	G/G	T/T	A/T	T/T	G/C	G/C	T/C	T/C	C/T	G/T	A/G	T/C
11	-	-	C/C	G/G	G/A	G/G	T/C	A/A	T/A	G/C	G/C	T/C	T/C	C/C	G/T	A/A	T/C
12	-	-	A/A	G/G	A/A	G/G	T/T	T/T	T/T	C/C	C/C	T/C	T/C	C/T	G/T	A/A	T/C
13	-	-	C/C	G/G	G/A	G/G	T/C	A/A	T/A	G/C	G/C	T/C	T/C	C/T	G/G	A/A	T/C
14	-	-	C/A	G/G	G/A	G/G	T/C	A/A	T/A	G/C	G/C	T/C	T/C	C/C	G/G	A/A	T/C
15	-	-	A/A	G/G	A/A	G/G	T/T	A/T	T/T	G/C	C/C	T/C	T/C	C/C	G/G	A/G	T/C
16	-	-	A/A	G/G	A/A	G/G	T/T	A/A	T/T	G/C	G/C	T/C	T/C	C/T	G/T	A/G	T/C
17	-	-	C/C	G/G	G/A	G/G	T/C	A/A	T/A	G/C	G/C	T/C	T/C	C/T	G/G	A/A	T/C
18	-	-	A/A	G/G	G/A	G/G	T/C	A/A	T/A	G/G	G/G	T/C	T/C	C/T	G/T	A/G	T/C
19	-	-	C/A	G/G	G/A	G/G	T/C	A/A	T/A	G/C	G/C	T/C	T/C	C/T	G/G	A/A	T/C
20	-	-	C/A	G/G	A/A	G/G	T/T	A/A	T/T	G/G	G/G	T/C	T/C	C/C	G/T	A/G	T/C
21	-	-	C/A	G/G	G/A	G/G	T/C	A/A	T/A	G/G	G/G	T/C	T/C	C/T	G/G	A/A	T/C
22	-	-	C/A	G/G	A/A	G/G	T/T	A/T	T/T	G/C	C/C	T/C	T/C	C/T	G/G	A/G	T/C
23	-	-	C/A	G/G	G/A	G/G	T/C	A/A	T/A	G/C	G/C	T/C	T/C	C/C	G/G	A/A	T/C
24	-	-	C/C	G/G	A/A	G/G	T/T	T/T	T/T	C/C	C/C	T/C	T/C	C/T	G/T	A/G	T/C
25	-	-	A/A	G/G	A/A	G/G	T/T	A/T	T/T	G/C	C/C	T/C	T/C	C/C	G/G	A/G	T/C
26	-	-	C/A	G/G	G/A	G/G	T/C	A/A	T/A	G/C	G/C	T/C	T/C	C/T	G/T	A/A	T/C
27	-	-	A/A	G/G	A/A	G/G	T/T	T/T	T/T	C/C	C/C	T/C	T/C	C/T	T/T	A/A	T/C
28	-	-	A/A	G/G	A/A	G/G	T/T	T/T	T/T	C/C	G/C	T/C	T/C	C/T	T/T	A/G	T/C
29	-	-	C/A	G/G	A/A	G/G	T/T	T/T	T/T	C/C	C/C	T/C	T/C	C/T	G/G	A/A	T/C
30	-	-	C/C	G/G	A/A	G/G	T/T	A/A	T/T	G/C	G/C	T/C	T/C	C/T	T/T	A/A	T/C
31	-	-	A/A	G/G	G/A	G/G	T/C	A/T	T/A	G/C	C/C	T/C	T/C	C/T	G/G	A/G	T/C
32	-	-	C/A	G/G	A/A	G/G	T/T	T/T	T/T	C/C	C/C	T/C	T/C	C/T	G/G	A/A	T/C
33	-	-	C/A	G/G	G/A	G/G	T/C	A/A	T/A	G/G	G/G	T/C	T/C	C/T	G/T	A/A	T/C
34	-	-	A/A	G/G	G/A	G/G	T/C	A/A	T/A	G/G	G/G	T/C	T/C	C/C	G/G	A/G	T/C
35	-	-	C/C	G/G	G/A	G/G	T/C	A/A	T/A	G/G	G/G	T/C	T/C	C/C	G/T	A/A	T/C
36	-	-	C/A	G/G	G/A	G/G	T/C	A/A	T/A	G/G	G/G	T/C	T/C	C/T	G/G	A/G	T/C
37	-	-	A/A	G/G	A/A	G/G	T/T	T/T	T/T	C/C	C/C	T/C	T/C	C/T	G/G	A/A	T/C
38	-	-	C/C	G/G	G/A	G/G	T/C	T/T	T/A	C/C	C/C	T/C	T/C	C/T	G/T	A/A	T/C
39	-	-	A/A	G/G	G/A	G/G	T/C	T/T	T/A	C/C	C/C	T/C	T/C	C/T	T/T	A/A	T/C
40	-	-	A/A	G/G	A/A	G/G	T/T	T/T	T/T	C/C	C/C	T/C	T/C	C/C	G/T	A/A	T/C
41	-	-	A/A	G/G	G/A	G/G	T/C	A/A	T/A	G/G	G/G	T/C	T/C	C/C	G/G	A/A	T/C
42	-	-	C/A	G/G	A/A	G/G	T/T	T/T	T/T	C/C	C/C	T/C	T/C	C/C	G/T	A/A	T/C
43	-	-	A/A	G/G	G/A	G/G	T/C	A/A	T/A	G/C	G/C	T/C	T/C	C/C	G/T	A/G	T/C
44	-	-	A/A	G/G	A/A	G/G	T/T	A/T	T/T	G/C	G/C	T/C	T/C	C/T	G/T	A/A	T/C
45	-	-	A/A	G/G	G/A	G/G	T/C	A/A	T/A	G/G	G/G	T/C	T/C	C/C	T/T	A/A	T/C
46	-	-	A/A	G/G	G/A	G/G	T/C	A/T	T/T	G/C	C/C	T/C	T/C	C/T	G/G	A/A	T/C
47	-	-	C/C	G/G	A/A	G/G	T/T	T/T	T/T	C/C	C/C	T/C	T/C	C/T	G/T	A/A	T/C
48	-	-	C/C	G/G	G/A	G/G	T/C	A/T	T/T	G/C	G/C	C/C	T/T	C/C	G/T	A/G	C/C
49	-	-	A/A	G/G	G/G	G/G	C/C	A/A	T/A	G/G	G/G	C/C	T/T	C/C	G/T	A/A	C/C
50	-	-	A/A	G/G	G/A	G/G	T/C	A/A	T/A	G/C	G/C	T/C	T/C	C/T	G/T	A/G	T/C
51	-	-	C/A	G/G	G/G	G/G	C/C	A/A	T/A	G/C	G/C	C/C	T/T	C/C	G/G	A/A	C/C
52	-	-	C/C	G/G	G/A	G/G	T/C	A/A	T/A	G/G	G/G	T/C	T/C	C/T	G/G	A/G	T/C
53	-	-	C/A	G/G	G/A	G/G	T/C	A/A	T/A	G/C	G/C	C/C	T/T	C/C	G/G	G/G	C/C
54	-	-	A/A	G/G	G/A	G/G	T/C	T/T	T/T	C/C	C/C	T/C	T/C	C/C	G/G	A/A	T/C
55	-	-	A/A	G/G	G/G	G/G	C/C	A/A	T/A	G/G	G/G	C/C	T/T	C/T	G/T	G/G	C/C
56	-	-	C/C	G/G	A/A	G/G	T/T	A/A	T/A	G/G	G/G	T/C	T/C	C/C	G/T	A/G	T/C
57	-	-	C/A	G/G	G/A	G/G	T/C	A/T	T/T	G/C	G/C	C/C	T/T	C/T	G/G	A/A	C/C
58	-	-	A/A	G/G	A/A	G/G	T/T	T/T	T/T	C/C	C/C	T/C	T/C	C/C	T/T	A/A	T/C
59	-	-	A/A	G/G	A/A	G/G	T/T	T/T	T/T	C/C	C/C	T/C	T/C	C/C	T/T	A/G	T/C
60	-	-	C/A	G/G	A/A	G/G	T/T	T/T	T/T	C/C	G/C	T/C	T/C	C/T	G/T	A/A	T/C
61	-	-	A/A	G/G	A/A	G/G	T/T	A/T	T/T	G/C	C/C	T/C	T/C	C/C	T/T	A/A	T/C
62	-	-	A/A	G/G	A/A	G/G	T/T	T/T	T/T	C/C	C/C	T/C	T/C	C/C	G/T	A/G	T/C
63	-	-	C/C	G/G	G/A	G/G	T/C	A/A	T/A	G/C	G/C	T/C	T/C	C/C	G/T	A/A	T/C
64	-	-	C/A	G/G	G/A	G/G	T/C	A/A	T/A	G/C	G/C	T/C	T/C	C/C	T/T	A/A	T/C
65	-	-	A/A	G/G	G/A	G/G	T/C	A/A	T/A	G/C	G/C	C/C	T/T	C/C	G/T	A/A	C/C
66	-	-	A/A	G/G	G/A	G/G	T/C	A/A	T/A	G/G	G/G	T/C	T/C	C/T	T/T	A/A	T/C
67	-	-	A/A	G/G	G/A	G/G	T/C	A/A	T/A	G/C	G/C	C/C	T/T	C/T	G/G	A/G	C/C
68	-	-	C/A	G/G	G/A	G/G	T/C	A/T	T/T	G/C	G/C	C/C	T/T	C/T	G/T	A/G	C/C
69	-	-	A/A	G/G	A/A	G/G	T/T	A/T	T/T	G/C	C/C	T/C	T/C	C/C	T/T	A/G	T/C
70	-	-	C/A	G/G	G/A	G/G	T/C	A/A	T/A	G/C	G/C	C/C	T/T	C/C	G/T	A/A	C/C
71	-	-	A/A	G/G	G/G	G/G	C/C	A/A	T/A	G/G	G/G	C/C	T/T	C/T	G/T	G/G	C/C
72	-	-	C/C	G/G	G/G	G/G	C/C	A/A	T/A	G/G	G/G	C/C	T/T	C/C	G/T	A/G	C/C
73	-	-	C/A	G/G	G/A	G/G	T/C	A/A	T/A	G/C	G/C	T/C	T/C	C/C	G/T	A/G	T/C
74	-	-	A/A	G/G	G/A	G/G	T/C	A/T	T/T	G/C	C/C	C/C	T/T	C/C	G/T	A/G	C/C
75	-	-	A/A	G/G	G/G	G/G	C/C	A/A	T/A	G/G	G/G	C/C	T/T	C/C	G/T	A/G	C/C
76	-	-	C/A	G/G	G/A	G/G	T/C	A/A	T/A	G/C	G/G	C/C	T/T	C/T	G/T	A/G	C/C
77	-	-	C/A	G/G	G/G	G/G	C/C	A/A	T/A	G/G	G/G	C/C	T/T	C/T	G/G	G/G	C/C
78	-	-	A/A	G/G	G/A	G/G	T/C	A/A	T/A	G/G	G/G	T/C	T/C	C/C	G/G	A/G	T/C
79	-	-	C/A	G/G	A/A	G/G	T/T	T/T	T/T	C/C	C/C	T/C	T/C	C/T	G/T	A/A	T/C
80	-	-	C/A	G/G	G/A	G/G	T/C	A/A	T/A	G/C	G/C	T/C	T/C	C/C	G/T	A/A	T/C
81	-	-	A/A	G/G	A/A	G/G	T/T	A/T	T/T	G/C	G/C	T/C	T/C	C/C	G/T	A/G	T/C
82	-	-	C/C	G/G	A/A	G/G	T/T	A/T	T/T	G/C	C/C	T/C	T/C	C/C	G/T	A/A	T/C
83	-	-	A/A	G/G	G/A	G/G	T/C	A/A	T/A	G/C	G/C	T/C	T/C	C/T	G/G	A/A	T/C
84	-	-	A/A	G/G	A/A	G/G	T/T	A/T	T/T	G/C	C/C	T/C	T/C	C/T	G/G	A/A	T/C
85	-	-	A/A	G/G	G/A	G/G	T/C	A/A	T/A	G/G	G/G	T/C	T/C	C/T	G/G	A/G	T/C
86	-	-	C/C	G/G	A/A	G/G	T/T	T/T	T/T	C/C	C/C	T/C	T/C	C/C	T/T	A/G	T/C
87	-	-	C/A	G/G	A/A	G/G	T/T	T/T	T/T	C/C	C/C	T/C	T/C	C/T	T/T	A/G	T/C
88	-	-	A/A	G/G	G/A	G/G	T/C	A/A	T/A	G/G	G/G	T/C	T/C	C/T	G/G	A/G	T/C
89	-	-	C/A	G/G	A/A	G/G	T/T	A/T	T/T	G/C	C/C	T/C	T/C	C/T	G/T	A/G	T/C
90	-	-	A/A	G/G	A/A	G/G	T/T	T/T	T/T	C/C	C/C	T/C	T/C	C/C	G/G	A/A	T/C
91	-	-	A/A	G/G	G/A	G/G	T/C	A/A	T/A	G/C	G/C	T/C	T/C	C/T	T/T	A/G	T/C
92	-	-	A/A	G/G	A/A	G/G	T/T	T/T	T/T	C/C	C/C	T/C	T/C	C/T	G/G	A/A	T/C
93	-	-	C/A	G/G	G/A	G/G	T/C	T/T	T/A	C/C	C/C	T/C	T/C	C/T	G/G	A/A	T/C
94	-	-	C/A	G/G	A/A	G/G	T/T	T/T	T/T	C/C	C/C	T/C	T/C	C/T	T/T	A/G	T/C
95	-	-	A/A	G/G	G/A	G/G	T/C	A/A	T/A	G/G	G/G	T/C	T/C	C/C	G/G	A/A	T/C
96	-	-	A/A	G/G	G/A	G/G	T/C	T/T	T/T	C/C	C/C	T/C	T/C	C/T	G/G	A/A	T/C
- indicates no genotyping signal
